# Supplementary material for: Prediction of effective genome size in metagenomic samples
Source: PubMed Central journal article supplement (PMC1839125; doi:10.1186/gb-2007-8-1-r10), 2007-01-15

**Additional Figure 1: Error distribution for EGS prediction on simulated reads.** On a test set of species not used for parameter estimation, we defined relative errors as (prediction by Eq.(1) – known genome size) / (known genome size). Errors are approximately normally distributed (a) (Shapiro-Wilks test:  $P=0.88$ ). Errors are approximately independent of read length (b) and genome size (c). The dependence of the standard deviation on the sequencing depth is as expected under a simple binomial model (d). Red dashed lines (b-c) and dots (d) are estimated standard deviations; the blue dotted line in (d) is the expected standard deviation under the binomial model.

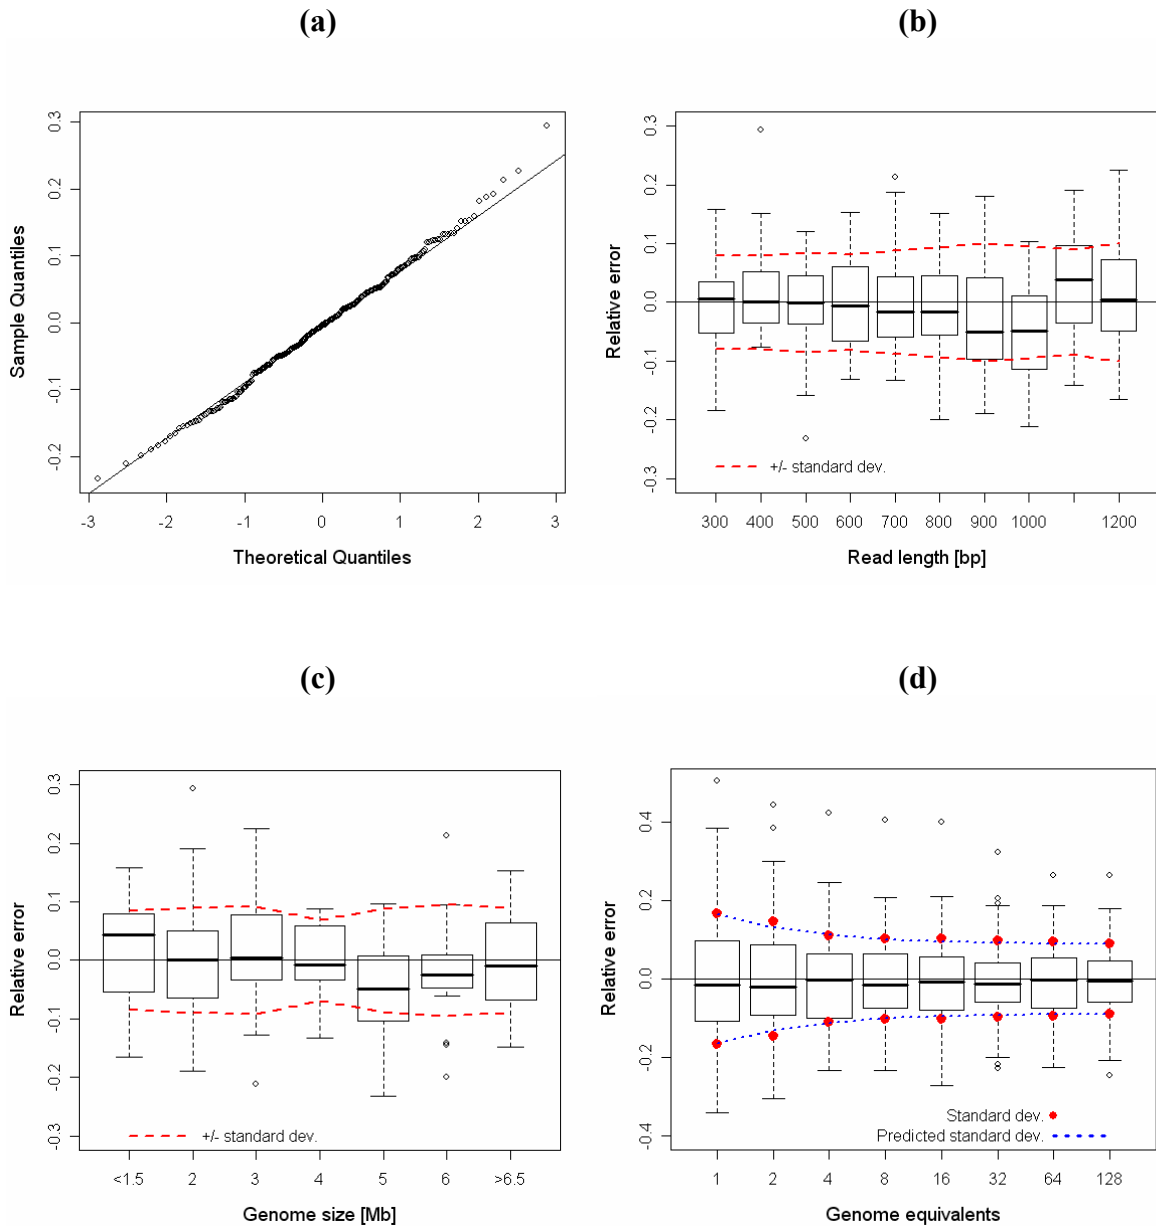

Supplement: gb-2007-8-1-r10-S2.pdf [file gb-2007-8-1-r10-S2.pdf]
