# Supplementary material for: Prediction of effective genome size in metagenomic samples
Source: PubMed Central journal article supplement (PMC1839125; doi:10.1186/gb-2007-8-1-r10), 2007-01-15

**Additional Figure 4: Error distribution for EGS prediction on simulated reads, using the bacterial-specific version of the prediction formula.** On a test set of species not used for parameter estimation, we defined relative errors as (prediction by Eq.(1) – known genome size) / (known genome size). Errors are approximately normally distributed (a) (Shapiro-Wilks test:  $P=0.074$ ). Errors are approximately independent of read length (b) and genome size (c). Red dashed lines (b-c) are estimated standard deviations.

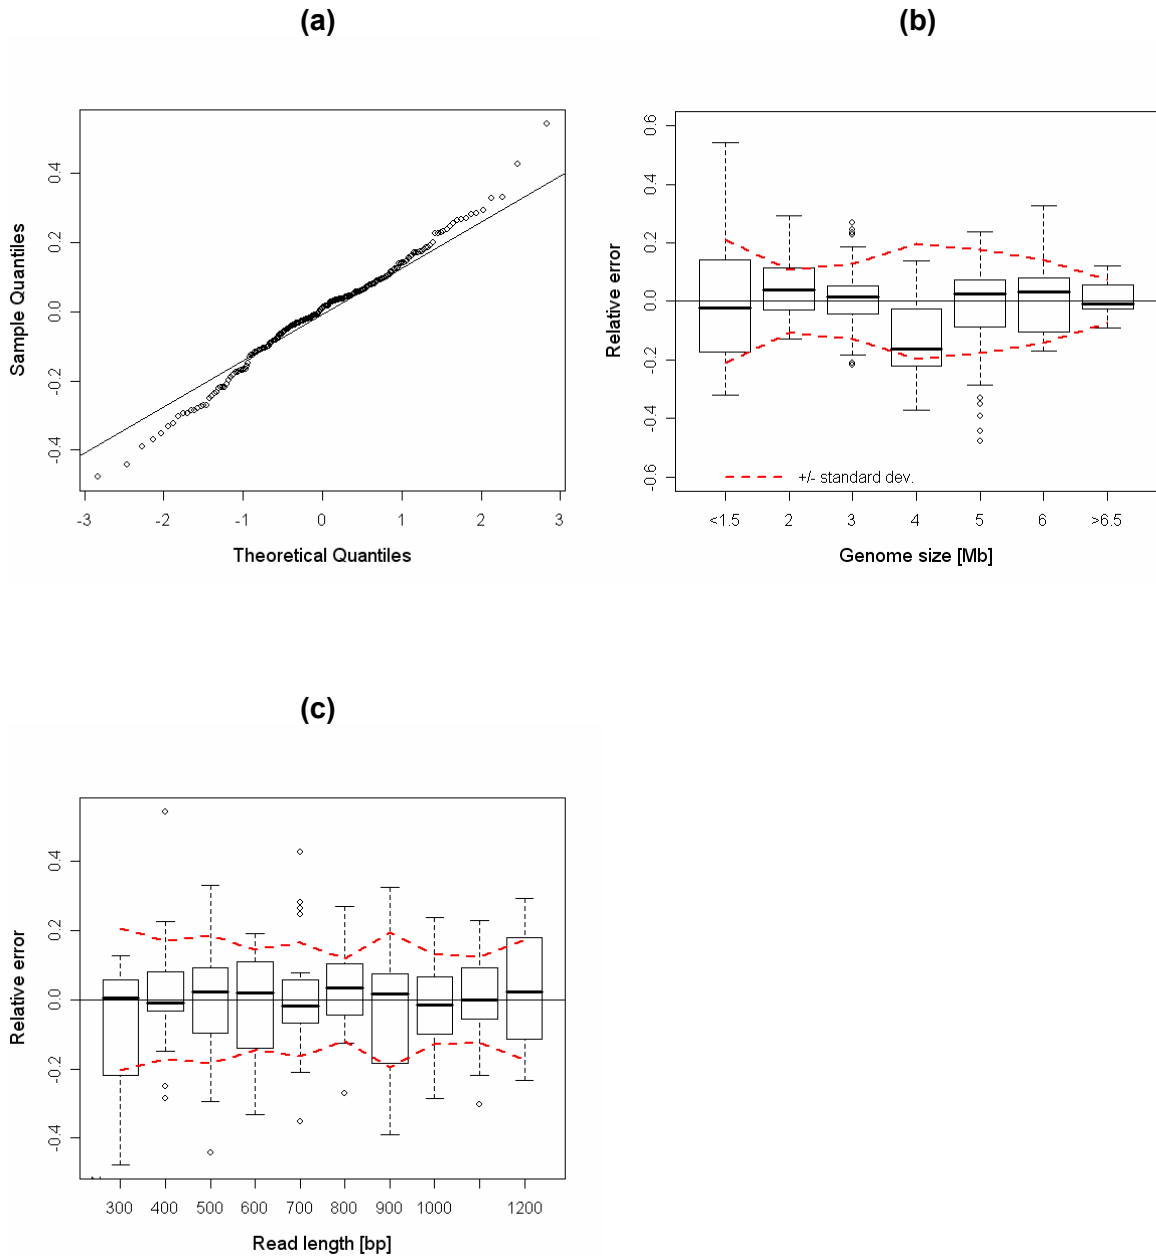

Supplement: gb-2007-8-1-r10-S5.pdf [file gb-2007-8-1-r10-S5.pdf]
