# Supplementary material for: Prediction of effective genome size in metagenomic samples
Source: PubMed Central journal article supplement (PMC1839125; doi:10.1186/gb-2007-8-1-r10), 2007-01-15
Supplement: gb-2007-8-1-r10-S8.pdf [file gb-2007-8-1-r10-S8.pdf]

**Additional Table 2:** Randomly selected genomes and read lengths used for calibration

| <b>Species</b>                          | <b>Readlength sizes used</b> |
|-----------------------------------------|------------------------------|
| <i>Aeropyrum pernix</i>                 | 400, 500, 600, 700, 800      |
| <i>Agrobacterium tumefaciens</i> Cereon | 400, 500, 900, 1000, 1200    |
| <i>Agrobacterium tumefaciens</i> Dupont | 700, 1000, 1100, 1200        |
| <i>Aquifex aeolicus</i>                 | 400, 500, 900, 1100          |
| <i>Archaeoglobus fulgidus</i>           | 500, 1100                    |
| <i>Bacillus anthracis</i> Ames          | 300, 800, 900, 1000          |
| <i>Bacillus cereus</i> ATCC 10987       | 300, 900, 1200               |
| <i>Bacillus cereus</i> ATCC 14579       | 300, 500, 600                |
| <i>Bacillus halodurans</i>              | 500, 600, 1000, 1100         |
| <i>Bacillus subtilis</i>                | 600                          |
| <i>Bacteroides thetaiotaomicron</i>     | 600, 800                     |
| <i>Bdellovibrio bacteriovorus</i>       | 300, 800, 900, 1100, 1200    |
| <i>Bifidobacterium longum</i>           | 1000, 1100                   |
| <i>Blochmannia floridanus</i>           | 600, 1000                    |
| <i>Bordetella bronchiseptica</i>        | 300, 1000                    |
| <i>Bordetella parapertussis</i>         | 500, 600, 700, 900, 1200     |
| <i>Bordetella pertussis</i>             | 500, 1100, 1200              |
| <i>Borrelia burgdorferi</i>             | 300, 800, 1200               |
| <i>Bradyrhizobium japonicum</i>         | 700, 900, 1200               |
| <i>Brucella melitensis</i>              | 300, 700, 1000               |
| <i>Brucella suis</i>                    | 400, 500, 600, 700           |
| <i>Buchnera aphidicola</i> APS          | 400, 1200                    |
| <i>Buchnera aphidicola</i> Bp           | 300, 400, 600                |
| <i>Buchnera aphidicola</i> Sg           | 400, 500, 900, 1000          |
| <i>Campylobacter jejuni</i>             | 900, 1100, 1200              |
| <i>Chlamydia muridarum</i>              | 700, 1000                    |
| <i>Chlamydia pneumoniae</i> AR39        | 900, 1000, 1100, 1200        |
| <i>Chlamydia pneumoniae</i> CWL029      | 400, 700, 1000               |
| <i>Chlamydia pneumoniae</i> J138        | 300, 600, 800, 1200          |
| <i>Chlamydia trachomatis</i>            | 300, 600, 800                |
| <i>Chlamydomphila caviae</i>            | 400, 700, 800                |
| <i>Chlamydomphila pneumoniae</i> TW183  | 400, 800, 900, 1200          |
| <i>Chlorobium tepidum</i>               | 300, 500, 600, 700, 900      |
| <i>Chromobacterium violaceum</i>        | 300, 600, 1000               |
| <i>Clostridium acetobutylicum</i>       | 400, 600, 700                |
| <i>Clostridium perfringens</i>          | 500, 800, 900, 1000          |
| <i>Clostridium tetani</i>               | 500, 600, 700, 1000          |
| <i>Corynebacterium glutamicum</i> 13032 | 400, 600, 700, 1000, 1100    |
| <i>Coxiella burnetii</i>                | 1100                         |
| <i>Deinococcus radiodurans</i>          | 800, 900, 1100, 1200         |
| <i>Desulfovibrio vulgaris</i>           | 700, 900, 1100               |
| <i>Enterococcus faecalis</i>            | 800                          |
| <i>Escherichia coli</i> EDL933          | 700, 800                     |
| <i>Escherichia coli</i> K12             | 300, 800                     |
| <i>Escherichia coli</i> O157:H7         | 900, 1000                    |

|                                            |                                      |
|--------------------------------------------|--------------------------------------|
| <i>Escherichia coli</i> O6                 | 400, 500, 700, 1000, 1100, 1200      |
| <i>Fusobacterium nucleatum</i>             | 700, 1100, 1200                      |
| <i>Geobacter sulfurreducens</i>            | 1100                                 |
| <i>Gloeobacter violaceus</i>               | 300, 400, 800, 900                   |
| <i>Haemophilus ducreyi</i>                 | 1200                                 |
| <i>Haemophilus influenzae</i>              | 1100                                 |
| <i>Halobacterium</i> sp. NRC-1             | 700, 900                             |
| <i>Helicobacter hepaticus</i>              | 400, 500, 700, 1100                  |
| <i>Helicobacter pylori</i> 26695           | 500, 800, 900, 1100, 1200            |
| <i>Helicobacter pylori</i> J99             | 400                                  |
| <i>Lactobacillus johnsonii</i>             | 600, 1100                            |
| <i>Lactobacillus plantarum</i>             | 400, 1200                            |
| <i>Lactococcus lactis</i>                  | 1000                                 |
| <i>Leptospira interrogans</i> 56601        | 700, 900                             |
| <i>Leptospira interrogans</i> L1-130       | 300, 500, 600, 1000                  |
| <i>Listeria innocua</i>                    | 500, 600, 1100                       |
| <i>Listeria monocytogenes</i> EGD          | 400, 500, 800, 1200                  |
| <i>Listeria monocytogenes</i> F2365        | 600, 1100                            |
| <i>Mesorhizobium loti</i>                  | 600, 1000                            |
| <i>Methanobacterium thermautotrophicum</i> | 300, 400, 1200                       |
| <i>Methanococcus jannaschii</i>            | 500, 600, 800, 900, 1200             |
| <i>Methanopyrus kandleri</i>               | 300, 400, 600, 700, 1000, 1100, 1200 |
| <i>Methanosarcina acetivorans</i>          | 300, 800                             |
| <i>Methanosarcina mazei</i>                | 900, 1000                            |
| <i>Mycobacterium bovis</i>                 | 400, 600, 800, 1100                  |
| <i>Mycobacterium leprae</i>                | 300                                  |
| <i>Mycobacterium tuberculosis</i> CDC1551  | 300, 700, 900, 1000, 1100, 1200      |
| <i>Mycobacterium tuberculosis</i> H37Rv    | 700, 1100, 1200                      |
| <i>Mycoplasma gallisepticum</i>            | 300, 1000, 1100                      |
| <i>Mycoplasma genitalium</i>               | 500, 600, 800, 1100                  |
| <i>Mycoplasma mobile</i>                   | 300, 500, 800                        |
| <i>Mycoplasma mycoides</i>                 | 300, 400, 800, 900, 1200             |
| <i>Mycoplasma penetrans</i>                | 400, 500, 1200                       |
| <i>Mycoplasma pneumoniae</i>               | 300, 900, 1000, 1200                 |
| <i>Mycoplasma pulmonis</i>                 | 500, 1200                            |
| <i>Nanoarchaeum equitans</i>               | 500, 600, 800, 1000                  |
| <i>Neisseria meningitidis</i> A            | 400, 700, 800, 1000, 1100            |
| <i>Neisseria meningitidis</i> B            | 800, 900, 1100                       |
| <i>Nitrosomonas europaea</i>               | 800, 1200                            |
| <i>Nostoc</i> sp. PCC 7120                 | 300, 700, 1000, 1100, 1200           |
| <i>Oceanobacillus iheyensis</i>            | 300, 1000, 1100                      |
| <i>Pasteurella multocida</i>               | 500, 600, 800, 900                   |
| <i>Photobacterium profundum</i>            | 1100, 1200                           |
| <i>Photorhabdus luminescens</i>            | 400                                  |
| <i>Phytoplasma</i> Onion yellows           | 300, 500, 900, 1100                  |
| <i>Porphyromonas gingivalis</i>            | 700, 800, 900                        |
| <i>Prochlorococcus marinus</i> CCMP1378    | 700, 800, 900                        |
| <i>Prochlorococcus marinus</i> MIT9313     | 600, 800, 900, 1000                  |
| <i>Prochlorococcus marinus</i> SS120       | 400, 1200                            |
| <i>Pseudomonas aeruginosa</i>              | 400, 500, 700, 1200                  |

|                                         |                                     |
|-----------------------------------------|-------------------------------------|
| <i>Pseudomonas putida</i>               | 300, 400, 500                       |
| <i>Pseudomonas syringae</i>             | 400, 700, 800, 900, 1100            |
| <i>Pyrobaculum aerophilum</i>           | 1000, 1100                          |
| <i>Pyrococcus abyssi</i>                | 400, 600, 700, 800, 1000, 1200      |
| <i>Pyrococcus furiosus</i>              | 700, 800, 1200                      |
| <i>Pyrococcus horikoshii</i>            | 300, 900, 1200                      |
| <i>Ralstonia solanacearum</i>           | 300, 400, 500, 1200                 |
| <i>Rhodopseudomonas palustris</i>       | 300, 400, 500, 700, 800, 900, 1200  |
| <i>Rickettsia conorii</i>               | 400, 800, 1000                      |
| <i>Rickettsia prowazekii</i>            | 300, 400, 1100                      |
| <i>Salmonella enterica</i>              | 300, 400, 800, 1000, 1200           |
| <i>Salmonella typhi</i>                 | 1000, 1100                          |
| <i>Salmonella typhimurium</i>           | 400, 500, 700, 800, 1000            |
| <i>Shewanella oneidensis</i>            | 300, 400, 500, 600, 700, 1000       |
| <i>Shigella flexneri</i> 2a 2457T       | 300, 500, 700, 1000, 1200           |
| <i>Sinorhizobium meliloti</i>           | 300, 400, 700, 800, 900, 1000       |
| <i>Staphylococcus aureus</i> MW2        | 1000, 1100                          |
| <i>Staphylococcus aureus</i> Mu50       | 400, 500, 700, 900                  |
| <i>Staphylococcus aureus</i> N315       | 300, 500, 1000, 1100, 1200          |
| <i>Staphylococcus epidermidis</i>       | 500, 600, 700                       |
| <i>Streptococcus agalactiae</i> III     | 600, 900, 1100                      |
| <i>Streptococcus agalactiae</i> V       | 700, 1100                           |
| <i>Streptococcus mutans</i>             | 1000                                |
| <i>Streptococcus pneumoniae</i> R6      | 800, 900, 1200                      |
| <i>Streptococcus pneumoniae</i> TIGR4   | 800, 900, 1100                      |
| <i>Streptococcus pyogenes</i> M1        | 600, 800                            |
| <i>Streptococcus pyogenes</i> MGAS315   | 300, 500, 900                       |
| <i>Streptococcus pyogenes</i> MGAS8232  | 500, 600                            |
| <i>Streptococcus pyogenes</i> SSI-1     | 300, 500, 600, 700, 800, 1000, 1200 |
| <i>Streptomyces avermitilis</i>         | 600, 1200                           |
| <i>Streptomyces coelicolor</i>          | 500, 600, 1100                      |
| <i>Sulfolobus solfataricus</i>          | 300, 600, 700, 1200                 |
| <i>Sulfolobus tokodaii</i>              | 800, 900                            |
| <i>Synechococcus elongatus</i>          | 300, 500, 800, 1200                 |
| <i>Synechococcus</i> sp. WH8102         | 400, 700, 900                       |
| <i>Synechocystis</i> sp. PCC6803        | 800, 900                            |
| <i>Thermoanaerobacter tengcongensis</i> | 400, 700, 800, 900                  |
| <i>Thermoplasma acidophilum</i>         | 400, 800, 1100                      |
| <i>Thermoplasma volcanium</i>           | 500, 600, 1200                      |
| <i>Thermotoga maritima</i>              | 600, 900                            |
| <i>Thermus thermophilus</i>             | 600, 1000, 1200                     |
| <i>Treponema denticola</i>              | 300, 400, 500, 600, 700, 800, 900   |
| <i>Treponema pallidum</i>               | 900                                 |
| <i>Tropheryma whipplei</i> TW08/27      | 1000, 1100                          |
| <i>Ureaplasma parvum</i>                | 400, 500                            |
| <i>Vibrio cholerae</i>                  | 300, 600, 1100                      |
| <i>Vibrio parahaemolyticus</i>          | 500, 600, 1100                      |
| <i>Vibrio vulnificus</i> CMCP6          | 400, 700                            |
| <i>Vibrio vulnificus</i> YJ016          | 700, 1000, 1100                     |
| <i>Wigglesworthia brevialpis</i>        | 500, 700, 800, 1100                 |

|                            |                            |
|----------------------------|----------------------------|
| Wolbachia sp. wMel         | 300, 400, 700              |
| Wolinella succinogenes     | 300, 400, 500, 900, 1000   |
| Xanthomonas axonopodis     | 500                        |
| Xanthomonas campestris     | 600, 900, 1000, 1100, 1200 |
| Xylella fastidiosa 700964  | 300, 400, 1000, 1200       |
| Xylella fastidiosa 9a5c    | 400, 500, 600, 700         |
| Yersinia pestis CO92       | 800, 900                   |
| Yersinia pestis KIM        | 300, 400, 700, 800, 1000   |
| Yersinia pestis Medievalis | 300, 900                   |

---
