# Supplementary material for: Prediction of effective genome size in metagenomic samples
Source: PubMed Central journal article supplement (PMC1839125; doi:10.1186/gb-2007-8-1-r10), 2007-01-15
Supplement: gb-2007-8-1-r10-S9.pdf [file gb-2007-8-1-r10-S9.pdf]

**Additional Table 3:** Shotgun sequencing projects used to estimate cloning bias. Sequence statistics were measured after trimming.

| Species                                           | #nucleotides | #reads | average read length |
|---------------------------------------------------|--------------|--------|---------------------|
| bacillus anthracis str ames                       | 55959099     | 114159 | 490.19              |
| bacillus cereus atcc 10987                        | 110580010    | 159666 | 692.57              |
| brucella suis 1330                                | 27154557     | 37870  | 717.05              |
| burkholderia mallei atcc 23344                    | 98761376     | 167050 | 591.21              |
| campylobacter jejuni rm1221                       | 15394604     | 24657  | 624.35              |
| chlamydia muridarum nigg                          | 7547044      | 18795  | 401.55              |
| chlamydomonas reinhardtii gpc                     | 10754382     | 19409  | 554.09              |
| chlorobium tepidum t1s                            | 13169968     | 34005  | 387.30              |
| colwellia psychrerythraea 34h                     | 44208367     | 68452  | 645.83              |
| coxiella burnetii rsa 493                         | 58790922     | 80520  | 730.14              |
| dechloromonas aromatica rcb                       | 91503870     | 131331 | 696.74              |
| dehalococcoides ethenogenes 195                   | 10345211     | 24689  | 419.02              |
| enterococcus faecalis v583                        | 16215162     | 36840  | 440.15              |
| geobacter sulfurreducens pca                      | 29082168     | 56430  | 515.37              |
| listeria monocytogenes str 4b f2365               | 38678250     | 57392  | 673.93              |
| methylococcus capsulatus str bath                 | 28332293     | 41703  | 679.38              |
| mycobacterium tuberculosis cdc1551                | 15497100     | 48288  | 320.93              |
| neisseria meningitidis mc58                       | 13711896     | 36912  | 371.48              |
| porphyromonas gingivalis w83                      | 14404514     | 35612  | 404.48              |
| prochlorococcus sp natl2a                         | 21825174     | 32942  | 662.53              |
| pseudomonas putida kt2440                         | 47943324     | 124665 | 384.58              |
| pseudomonas syringae pv syringae b728a            | 66055337     | 108648 | 607.98              |
| pseudomonas syringae pv tomato str dc3000         | 56468618     | 80760  | 699.22              |
| psychrobacter sp 273-4                            | 38868860     | 65342  | 594.85              |
| ralstonia eutropha jmp134                         | 89558712     | 148807 | 601.84              |
| shewanella oneidensis mr-1                        | 21340384     | 51648  | 413.19              |
| staphylococcus aureus col                         | 23768569     | 54913  | 432.84              |
| staphylococcus epidermidis rp62a                  | 82559248     | 120637 | 684.36              |
| streptococcus agalactiae 2603v r                  | 49536795     | 70603  | 701.62              |
| streptococcus pneumoniae tigr4                    | 4712789      | 11787  | 399.83              |
| thermobifida fusca yx                             | 74123360     | 129107 | 574.12              |
| treponema denticola atcc 35405                    | 27703695     | 48813  | 567.55              |
| wolbachia endosymbiont of drosophila melanogaster | 20127693     | 29617  | 679.60              |
