# Supplementary material for: Prediction of effective genome size in metagenomic samples
Source: PubMed Central journal article supplement (PMC1839125; doi:10.1186/gb-2007-8-1-r10), 2007-01-15
Supplement: gb-2007-8-1-r10-S10.pdf [file gb-2007-8-1-r10-S10.pdf]

**Additional Table 5:** Data statistics for available environmental shotgun sequencing datasets (measured after quality clipping)

| Sample             | total nucleotide count | number of reads | average read length | cell size due to filtering |
|--------------------|------------------------|-----------------|---------------------|----------------------------|
| acid mine drainage | 76,728,027             | 103,605         | 740.58              | no                         |
| whalefallAGZO      | 27,365,693             | 37,583          | 728.14              | no                         |
| whalefallAHAA      | 23,382,344             | 36,076          | 648.14              | no                         |
| whalefallAHAI      | 24,516,126             | 36,423          | 673.09              | no                         |
| soil               | 98,442,789             | 145,503         | 676.57              | no                         |
| sargasso sample1   | 554,785,149            | 644,320         | 861.04              | 0.1-0.8 $\mu\text{m}$      |
| sargasso sample2   | 272,963,119            | 316,776         | 861.69              | 0.22-0.8 $\mu\text{m}$     |
| sargasso sample3   | 315,627,830            | 368,694         | 856.07              | 0.22-0.8 $\mu\text{m}$     |
| sargasso sample4   | 290,599,003            | 332,014         | 875.26              | 0.22-0.8 $\mu\text{m}$     |
| sargasso sample5   | 118,650,701            | 141,001         | 841.49              | 3.0-20.0 $\mu\text{m}$     |
| sargasso sample6   | 78,220,704             | 90,867          | 860.83              | 0.8-3.0 $\mu\text{m}$      |
| sargasso sample7   | 82,521,289             | 92,327          | 893.79              | 0.1-0.8 $\mu\text{m}$      |
