# Supplementary material for: Prediction of effective genome size in metagenomic samples
Source: PubMed Central journal article supplement (PMC1839125; doi:10.1186/gb-2007-8-1-r10), 2007-01-15

**Figure 3: Error distribution for EGS prediction on real reads.** Relative errors are approximately normally distributed (a) (Shapiro-Wilks test:  $P=0.67$ ), and are independent of genome size (b). The red circles in (b) represent two data sets suffering from strong experimental biases (see main text).

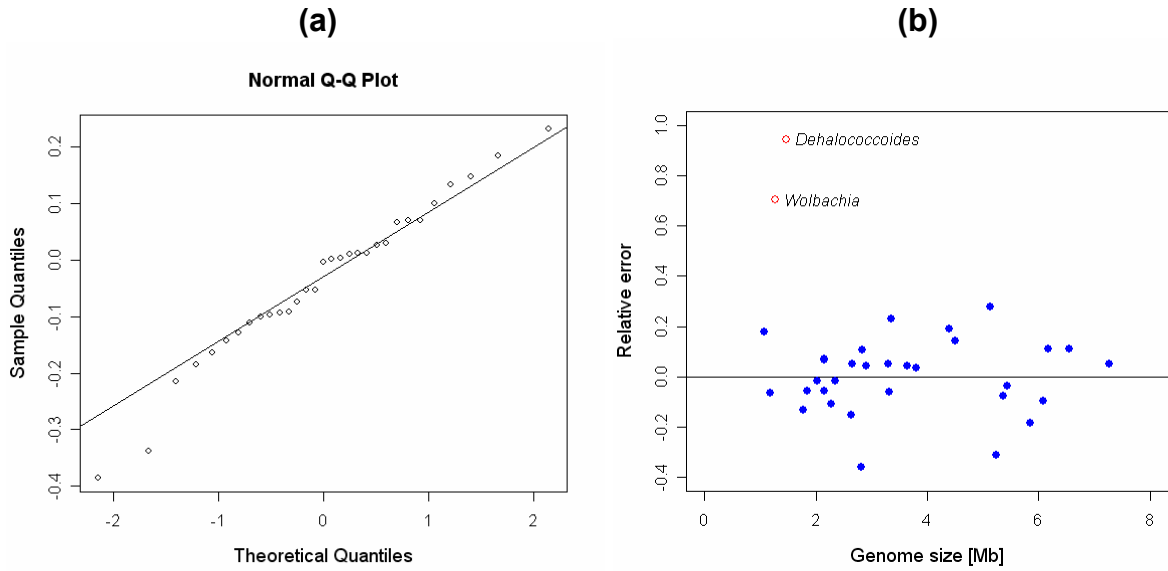

Supplement: gb-2007-8-1-r10-S11.pdf [file gb-2007-8-1-r10-S11.pdf]
